# Supplementary material
Source: publisher figshare collection journal article supplement (https://gsajournals.figshare.com/ndownloader/files/16258082)
Supplement: Supplementary file 1 [file 16258082]

# Supporting File S1

Daniel F. Paulo *et al* ., Specific Gene Disruption in the Major Livestock pests *Cochliomyia hominivorax* and *Lucilia cuprina* using CRISPR/Cas9

## Content:

Figure S1. Schematic timeline of *Cochliomyia hominivorax* rearing and CRISPR/Cas9 microinjection experiments.

Figure S2. Crossing scheme used to establish the biallelic *bwb*-mutant strain of the screwworm fly.

Figure S3. Cas9-mediated disruption of the *LcY* loci in the Australian sheep blowfly, *Lucilia cuprina*.

Figure S4. Orthology analysis of the *yellow* gene found in Schizophora species.

Figure S5. T7 endonuclease 1 assay (T7EN1) of Cas9 targeted sites in the screwworm genome.

Figure S6. Multiple Sequence Alignment of *bwb*-mutated alleles in *C. hominivorax* introduced by Cas9.

Figure S7. Phenotypic variation between mosaic *bwb* screwworm flies.

Figure S8. Multiple Sequence Alignment of *tra*-mutated alleles in *C. hominivorax* genome introduced by Cas9.

Table S1. Sequences of the single guide RNAs (sgRNAs) used in this study.

Table S2. Specifications of the genotyping primers used in this study

Table S3. Effect of Cas9 RNPs concentration on germline transmission of *bwb* mutation.

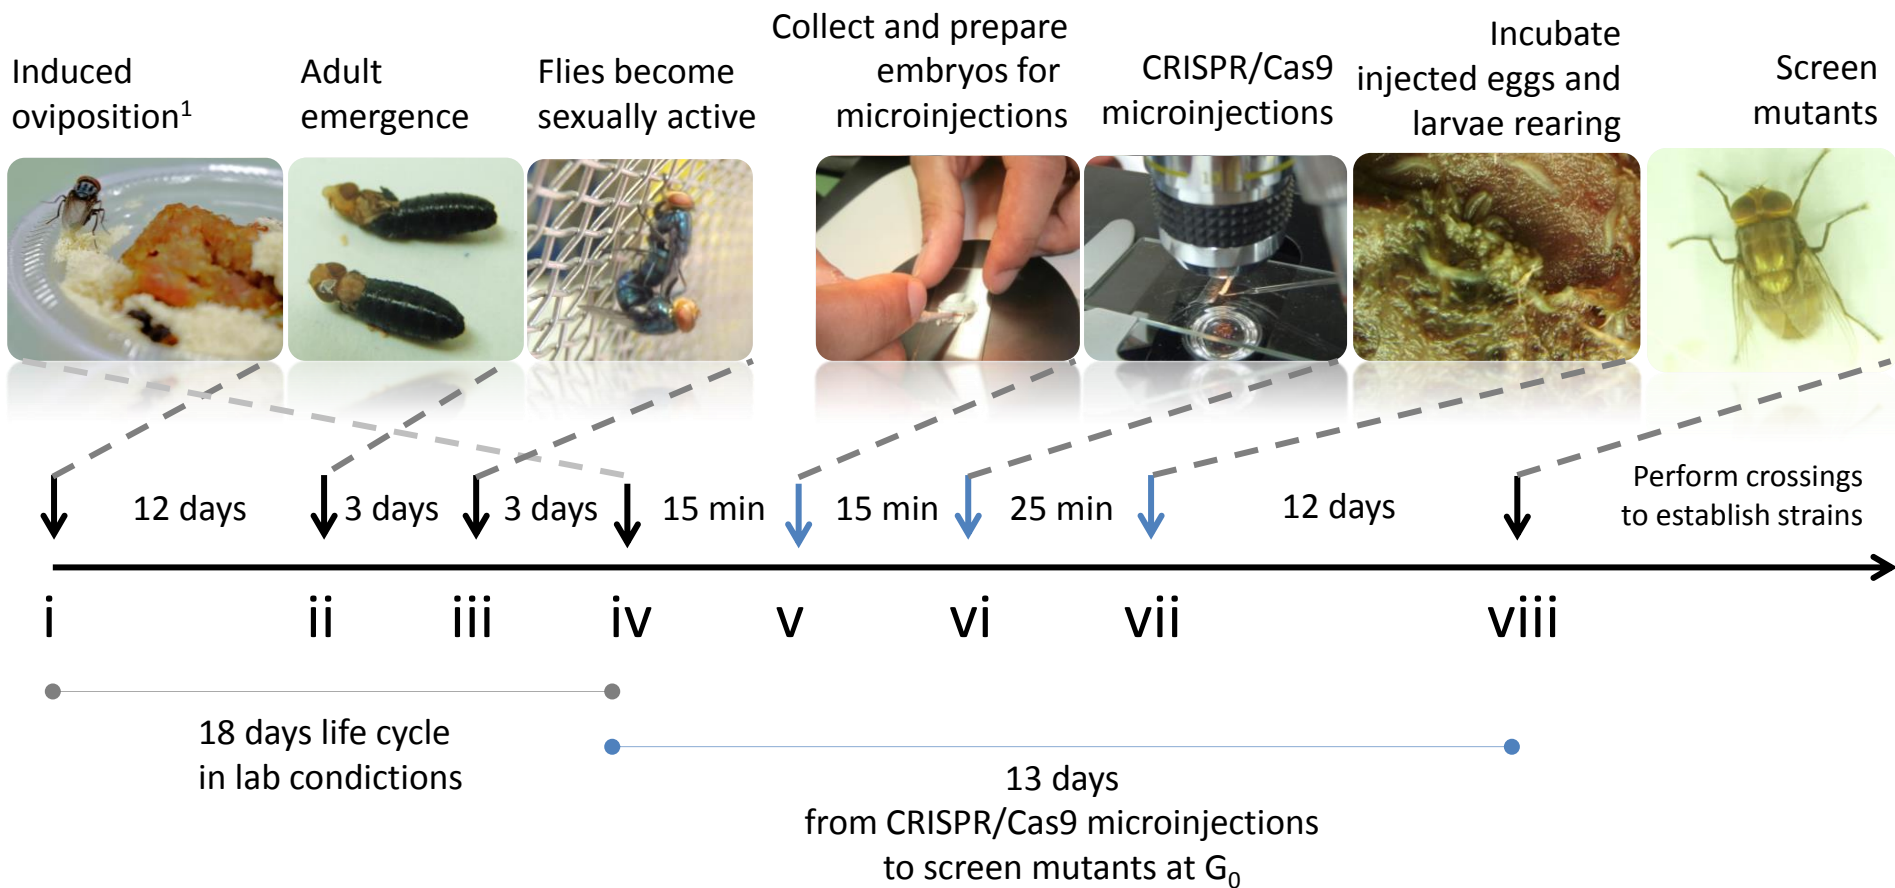

**Figure S1. Schematic timeline of *Cochliomyia hominivorax* rearing and CRISPR/Cas9 microinjection experiments.** The New World Screwworm fly takes 18 days to mature from eggs to adult in laboratory conditions (gray line: i to iv). Females are ready to lay eggs six days after emergence (i and iv). First instar larvae hatch ~12 hrs later, passing through three larval instars before dropping to the ground to pupate. Adults emerge 12 days after oviposition (ii) and females become sexually receptive three days after emergence (iii). For microinjections, fresh screwworm embryos are collected (iv), dissociated, aligned and dehydrated (v). Microinjections of CRISPR/Cas9 cocktail are performed into the posterior end of the pre-blastoderm embryos within the first 40 min of development (vi). After hatching, immatures are reared to develop until adulthood (vii) and emerged injected G<sub>0</sub> adults are subsequently screened for Cas9-induced mutations (viii). This entire experiment takes approximately 13 days to complete (blue line: iv to viii). <sup>1</sup>Photograph by Jorge Herrera.

**a**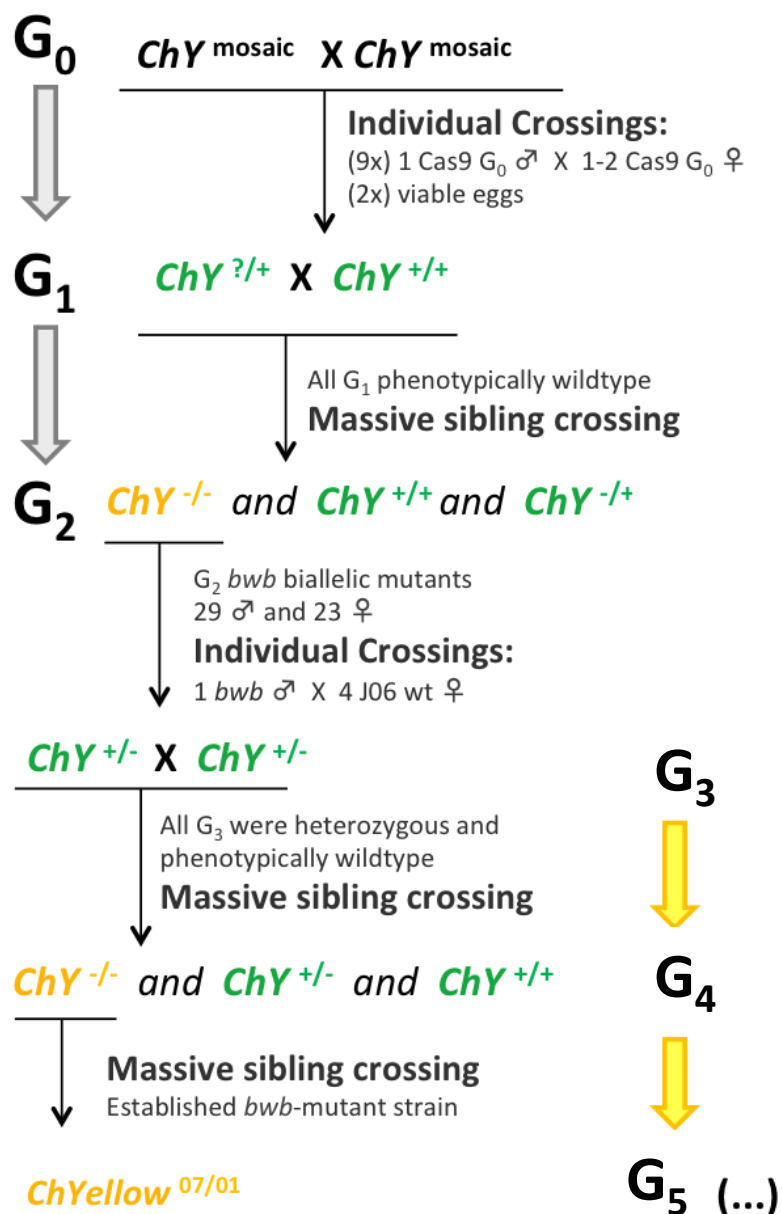**b**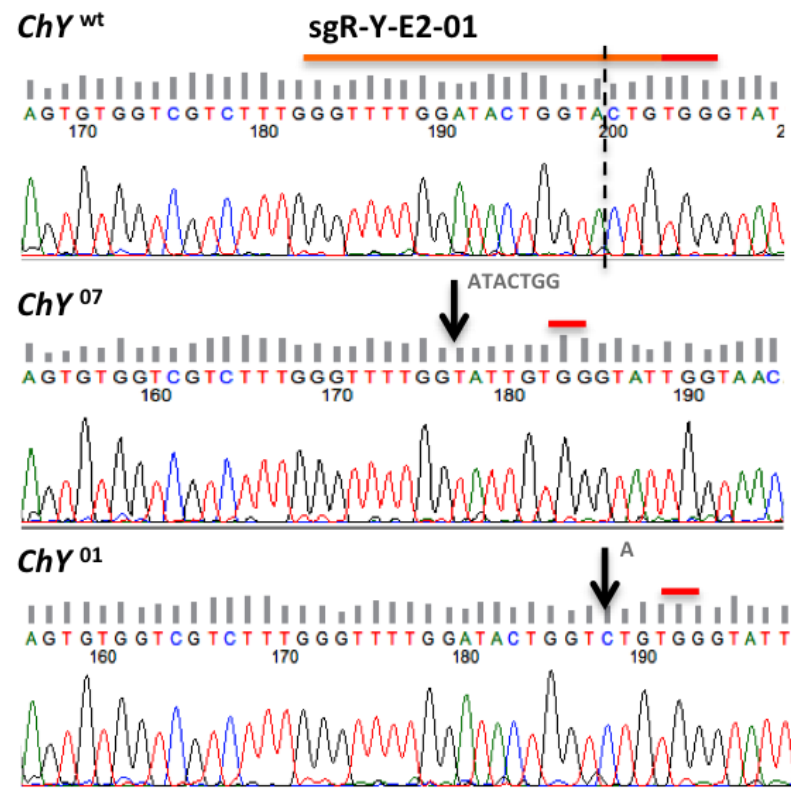

**Figure S2. Crossing scheme used to establish the biallelic *bwb*-mutant strain of the screwworm fly. (a)** Mosaic *bwb*-mutant flies (Fig. 1B, second column) were obtained after microinjections of Cas9 RNPs against the *ChYellow* loci. Nine individual crossings were made aiming to evaluate the inheritance capability of the Cas9-induced mutations in the *ChY* gene, but only 2 resulted in viable ovipositions. All *G<sub>1</sub>* flies were phenotypically wildtype, presumably heterozygous for the *bwb* mutation. As the *bwb* mutation is recessive and autosomal in *C. hominivorax*, only mutations in both copies of the *ChY* gene will result in the unpigmented body phenotype. Thus, massive sibling crossings were carried out, and biallelic *bwb* mutant flies were obtained at *G<sub>2</sub>* generation (Fig. 1B, last two columns). A *bwb* male was randomly selected and backcrossed to wildtype females (yellow arrows). The offspring were let to interbreed freely in cages and the obtained biallelic *bwb*-mutants used to establish the strain *ChYellow*<sup>07/01</sup>, currently being maintained at the COPEG biosecurity plant in Panama-PA. **(b)** Molecular genotyping of *ChYellow*<sup>07/01</sup>.

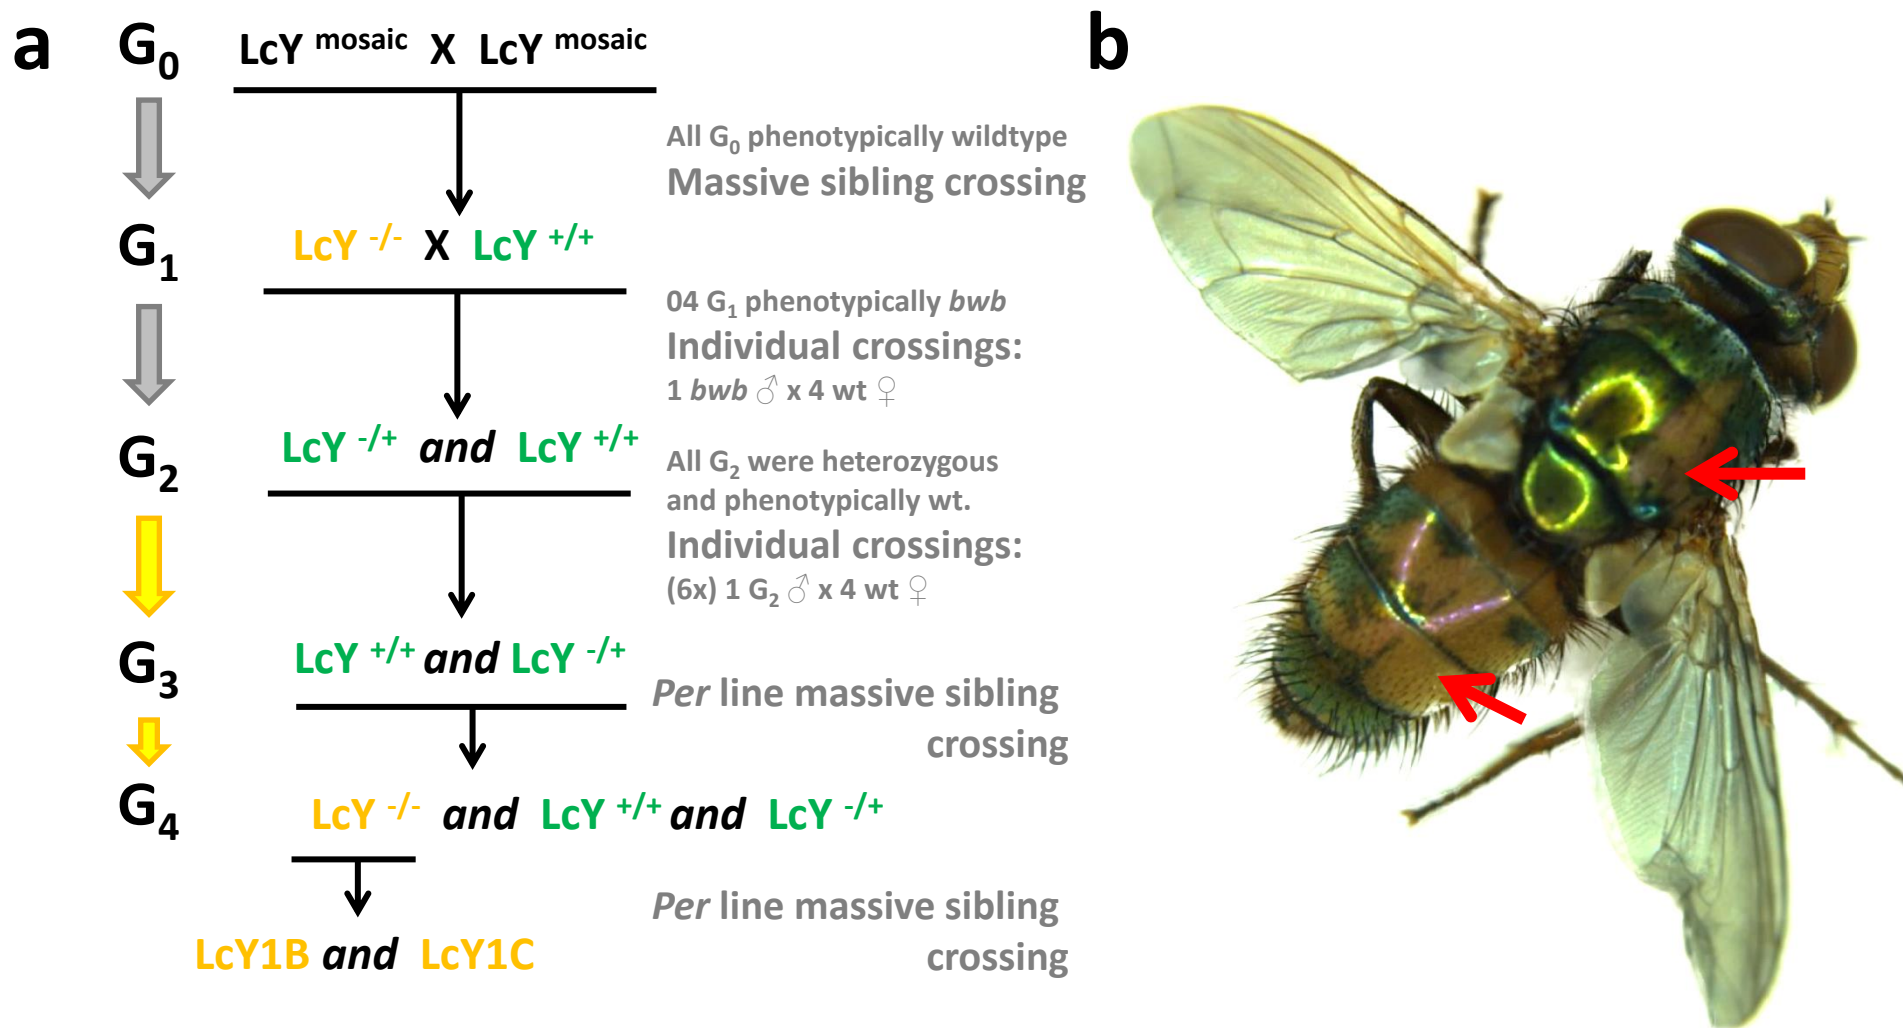

**Figure S3. Cas9-mediated disruption of the *LcY* locus in the Australian sheep blowfly, *Lucilia cuprina*.** (a) Crossing scheme used to establish the homozygous *bwb*-mutant strains LcY1B and LcY1C of *L. cuprina*. Briefly, all G<sub>0</sub> adults developed from microinjections were let to inbreed freely in cages, and from their offspring 4 adults showed the *bwb*-mutant phenotype. Molecular genotyping confirmed that mutants carried deletions in the *LcY* gene (Figure 2B). Since the *bwb*-mutants are likely to host different mutated alleles, *bwb* males at G<sub>1</sub> were individually backcrossed to wildtype females, followed by a second backcross at G<sub>2</sub>. Massive sibling crosses were then carried out at G<sub>3</sub> and any G<sub>4</sub> flies that showed the *bwb* phenotype were inbred to establish the homozygous mutant strains. (b) The presence of lightly pigmented body areas in the G<sub>0</sub> mosaic flies (indicated by red arrows) reveals biallelic hits in the *LcY* loci after microinjections using the Cas9 purified protein instead of the Cas9 mRNA.



|             |                                                                 |     |
|-------------|-----------------------------------------------------------------|-----|
| Drosophila  | MFQKGWI---LVTLITLVTPSWAAVKLQERYSWSQLDAFPNTRLKQQAASGDYIPQN       | 57  |
| Bactrocera  | MQANLRLRLNLVAVLCLVAHAQATYKYLQERYSWTELDFAFPNQGLKQQAASGDYIPQN     | 60  |
| Ceratitis   | MFANSHLSLRVAVLCLVAHAQATYKYLQERYSWTQMDFAFPNGLKQQAASGDYIPQN       | 60  |
| Lucilia     | ----MNCFLFSLLAUVCCVNAFATYKYLQERYSWNQDLDAFPNDQLKQQAASGDYIPQN     | 56  |
| Cochliomyia | ----MNCFKFSLAFACCLSVYSGAYKLQERYSWTQLDAFPNEQLKQQAASGDYIPQN       | 56  |
| Stomoxys    | ----MKCFLVGLLTFVLVQFGYATYKQLERFNNKQDLDAFPNENLKQQAASGDYIPQN      | 56  |
| Musca       | ----MKCLLVGLLTFVLCHFNGAAYKLQERFNWKLDAFPNENLKQQAASGDYIPQN        | 56  |
|             | ::: : .*****. :.:***** **.*:*****                               |     |
| Drosophila  | ALPVGVEHGNRLFVTVPRWRDGPATLTYINMDRSLTGSPELIPYDWRSNATGDCANS       | 117 |
| Bactrocera  | ALPVGVEHGNRLFVTVPRWRDGPATLTYINMDHSVTGSPELIPYDWRSNATGDCANS       | 120 |
| Ceratitis   | ALPVGMEHGNRLFVTVPRWRDGPATLTYINMDHSATGSPELIPYDWRSNATGDCANS       | 120 |
| Lucilia     | ALPVGVEHGNRLFVTVPRWRDGPATLTYINMDHSVTGSPALIPYDWRSNATGDCANS       | 116 |
| Cochliomyia | ALPVGVEHGNRLFVTVPRWRDGPATLTYINMDHSVTGSPALIPYDWRSNATGDCANS       | 116 |
| Stomoxys    | ALPVGVEHGNRLFVTVPRWRDGPATLTYINMEHVTGSPALIPYDWRSNATGDCANG        | 116 |
| Musca       | ALPVGVEHWNQLFVTIPRWRDGPATLTYINMDHSVTGSPALIPYDWRSNATGDCANS       | 116 |
|             | ****.*: * ***,*****.* ** * ** *                                 |     |
| Drosophila  | ITTAIRIKVDECGRLLWLDGTGVIGNTTTNCPYAVNVFDLTTDIRRYELPGVDNTP        | 177 |
| Bactrocera  | ITTAIRIKDECGRLLWLDGTGVIGNTTTNCPYAVNVFDLQTNTRIRRYELRPDDTNA       | 180 |
| Ceratitis   | ITTAIRIRADECGRLWLDGTGVIGNTTTNCPYAVNVFDLQTNTRIRHYELRAEDTNA       | 180 |
| Lucilia     | ITTAIRIQADECGRLWLDGTGVIGNTTTNCPYAVNVFDLQTNTRIRRYELRPDDTNA       | 176 |
| Cochliomyia | ITTAIRIQVDECGRLLWLDGTGVIGNTTTNCPYAVNVFDLQTNTRIRRYELRPDDTNA      | 176 |
| Stomoxys    | ITTAIRIKVDECGRLLWLDGTGIGNTTTNCPYAVNVFDLATHTRIRRYELNPEDTNA       | 176 |
| Musca       | ITTAIRIKVDECGRLLWLDGTGLGNTTTNCPYAVNVFDLATHTRIRRYELRPDDTNA       | 176 |
|             | ****.*: *****.* ** * ** *                                       |     |
| Drosophila  | NTFTIANIADVIGKNCDDAYAFAYFDELGYGLIAYSWE LNKSWRFSAHSYFFPDPLRGDFNV | 237 |
| Bactrocera  | NTFTIANVADVIGKSCDDAFAYFSDELGYGLVVSWEQNKSWRFSAHSYFFPDPLRGDFNI    | 240 |
| Ceratitis   | NTFTIANIADVIGKSCDDAFAYFSDELGYGLIVVSWEQNKSWRFSAHSYFFPDPLRGDFNI   | 240 |
| Lucilia     | NTFTIANIADVIGKSCDDAFAYFSDELGYGLIAYSWEQNKSWRFSAHSYFFPDPLRGDYN    | 236 |
| Cochliomyia | NSFTIANIADVIGKSCDDAFAYFSDELGYGLIAYSWEQNKSWRFSAHSYFFPDPLRGDYN    | 236 |
| Stomoxys    | NTFTIANIADVIGKSCDDAFAYFSDELGYGLISYSWEQNKSWRFSGHSYFFPDPLRGDYN    | 236 |
| Musca       | NTFTIANIADVIGKSCDDAFAYFSDELGYGLIAYSWEQNKSWRFSGHSYFFPDPLRGDYN    | 236 |
|             | *.***.*****.***.*****.***.*****.* ** * ** *                     |     |
| Drosophila  | AGINFQWGEEGIFGMSLSPRSDGYRTLYFSPASHRQFVAVSTRILRDETRTSDSYHDFV     | 297 |
| Bactrocera  | AGLNFQWGEEGIFGMSLSPRSDGYRTMFFSPLASHRQFVAVSTRILRDESREDSYHDFV     | 300 |
| Ceratitis   | AGLNFQWGEEGIFGMSLSPRSDGYRTMFFSPLASHRQFVAVSTRILRDESREDSYHDFV     | 300 |
| Lucilia     | AGLNFQWGEEGIFGMSLSPRSDGYRTMYFSPASHRQFVAVSTRILRDESREDSYHDFV      | 296 |
| Cochliomyia | AGLNFQWGEEGIFGMSLSPRSDGYRTMYFSPASHRQFVAVSTRILRDESREDSYHDFV      | 296 |
| Stomoxys    | AGLNFQWGEEGIFGMALSPRSDGYRTMYFSPASHRQFVAVSTRILRDESREDSYHDFI      | 296 |
| Musca       | AGLNFQWGEEGIFGMALSPRSDGYRTMYFSPASHRQFVAVSTRILRDETRVEDSYHDFI     | 296 |
|             | *.***.*****.***.*****.***.*****.* ** * ** *                     |     |
| Drosophila  | ALDERGPNSTHTSRVMSDDGIELFNLIDQNAVGCWHSSMPYSPQFHGIVDRDDVGLVFPA    | 357 |
| Bactrocera  | VLDERGPNSTHTSRVMSDDGIELFNLIDQNAVGCWHSSMPYQPFQFHGVDRDDVGLVFPA    | 360 |
| Ceratitis   | ALDERGPNSTHTSRVMSDDGIELFNLIDQNAVGCWHSSMPYTSQFHGIVDRDDVGLVFPA    | 360 |
| Lucilia     | ALDERGPNASTHTSRVMSDDGIELFNLIDQNAVGCWHSSMPYSPQFHGIVDRDDVGLVFPA   | 356 |
| Cochliomyia | ALDERGPNSTHTSRVMSDDGIELFNLIDQNAVGCWHSSMPYSPQFHGIVDRDDVGLVFPA    | 356 |
| Stomoxys    | ALDERGPNSTHTSRVMSDDGIELFNLIDQNAVGCWHSSMPYSPQFHGIVDRDDVGLVFPA    | 356 |
| Musca       | ALDERGPNSTHTSRVMSDDGIELFNLIDQNAVGCWHSSMPYSPQFHGIVDRDDVGLVFPA    | 356 |
|             | .*****.*:.*.***.*.*****.* ** * ** *                             |     |
| Drosophila  | DVKIDENKNVWVLSDRMPVFLSLDLDYSDTNFRIYTAPLTLIENTVCDLRN-NAYGPPN     | 416 |
| Bactrocera  | DVKIDENKNVWVLSDRMPVFLSLDLDYSDTNFRIYTAPLSALIDNTVCDLRN-NAYGPSN    | 419 |
| Ceratitis   | DIKIDENKNVWVLSDRMPVFLSLDLDYSDTNFRIYTAPLSLIENTVCDLRN-SAYGPSN     | 419 |
| Lucilia     | DVIIDENKNVWVLSDRMPVFLSLDLDYSDTNFRIYTAPLSTLIEGTCDQR-SAVYGPSN     | 415 |
| Cochliomyia | DVIDETKNVWVLSDRMPVFLSLDLDYSDTNFRIYTAPLSTLIEGTCDQR-SAVYGPSN      | 415 |
| Stomoxys    | DVKIDENKNVWVLSDRMPVFLSLDLDYSDTNFRIYTAPLSTLIEGTCDQRTSSVYGPNN     | 416 |
| Musca       | DVKIDENKNVWVLSDRMPVFLSLDLDYSDTNFRIYTAPLSTLIEGTCDQRT-SNNVYGPNN   | 415 |
|             | *.***.*****.***.*****.***.*****.* ** * ** *                     |     |

|             |                                                               |     |
|-------------|---------------------------------------------------------------|-----|
| Drosophila  | TVSI-----PKQAVLPMGPPLYTKQYRPVLPQKPQTS                         | 448 |
| Bactrocera  | AVGSTSFYATPTSTNSVFGTLGFGVGNKVYGGPNPVGLPKSSQTLFTKQYLPPLSIKPSIQ | 479 |
| Ceratitidis | SVGSTSFYGTPTSTNNIFGQPLNLGGNKVYGGPNPVSVPKSTQRFNPKYLPPLPTKPTLQ  | 479 |
| Lucilia     | AVS-----IPKQPPVYNKHYP LPLPQKPIHG                              | 441 |
| Cochliomyia | AVS-----IPKQNPVLYNKQYVPSLTQKPSQG                              | 444 |
| Stomoxys    | SVA-----AVKQPFPLYTKQYLPAPAKPTII                               | 443 |
| Musca       | SVA-----AVKPLHPYIPKTYLNP LNTAK----                            | 437 |
|             | :*.* : * *                                                    |     |
| Drosophila  | WA-SSPPPPSRITYLPANSIGNVSSISVSTNSVGPAGVEVPKAYIFNQ-HNGINYET--SG | 504 |
| Bactrocera  | ADVPRVAPPSSRNYLPPLMGTYGST-----TQRSDPAKAYVFN--NGLSYETGIGG      | 527 |
| Ceratitidis | ADIPRVAPPSSRNYLPPLMGTYGST-----TQRSDAAKAYVFN--NGLSYEAGVGG      | 527 |
| Lucilia     | TVIQPIAHPTPNYLP LPSYA-----SQKVDVPKTFVYNQ-QNGLTYEAS-NG         | 484 |
| Cochliomyia | TYIQHAALPSPTYLSSYA-----SQKVDVPKTFVYNQ-QNGLTYEAS-NG            | 484 |
| Stomoxys    | QHHPVPISSARPTYLPPYSG-----SQRLNVPSAFVYNQ-HNGLSYEAS-NG          | 487 |
| Musca       | PSYVAIPSSRPSYLPYSG-----SQRPNVPNAFLYNQHNALTYDAA-NG             | 482 |
|             | *** : . : : : * * . : : * *                                   |     |
| Drosophila  | PHLFPTHQAQP-----GGQDGGKLKTYVNARQSGWVHHQHQQG                   | 541 |
| Bactrocera  | PHLFPL-----HSEGLKNYVTTNRNSGWVTH----                           | 552 |
| Ceratitidis | PHLFLP-----HSEGLRNYVSARTSGWVLEH----                           | 553 |
| Lucilia     | PHLFPTIQL---TAHTSVSQPDGLKNYVTSRNSNWRHHHHH                     | 522 |
| Cochliomyia | PHLFPLPLQ---THQ---TVQPDGLKNYVSARSSNWRHHHPX                    | 521 |
| Stomoxys    | PHLFPAAIAHIQQIQHTA--QPEGLGSYATSRNTPWKKRQ---                   | 524 |
| Musca       | PHLFPAAIAHIQQIQHPAPAAREGLGSYATSRVPWWQHH--                     | 522 |
|             | ***** * * * * *                                               |     |

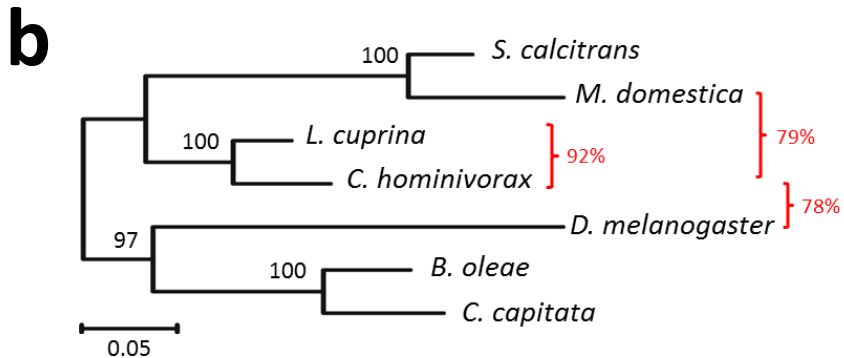

**Figure S4. Orthology analysis of the yellow gene found in Schizophora species.** (a) Multiple sequence alignment of yellow protein from *Drosophila melanogaster* (NP\_476792.1), *Bactrocera oleae* (XP\_014092322.1), *Ceratitis capitata* (XP\_004521097.1), *Lucilia cuprina* (XP\_023305007.1), *Cochliomyia hominivorax* (M.J.Scott, unpublished), *Stomoxys calcitrans* (XP\_013102593.1) and *Musca domestica* (XP\_011290952.1). Major Royal Jelly Protein (MRJP; pfam03022) conserved domain is highlighted in the yellow box (b) Evolutionary relationship of yellow protein reconstructed by the Maximum Likelihood method under the JTT+G+I substitution model. Node supports were estimated under 100 replicates of bootstrap. Sequence identity between key species are shown in red.

**a**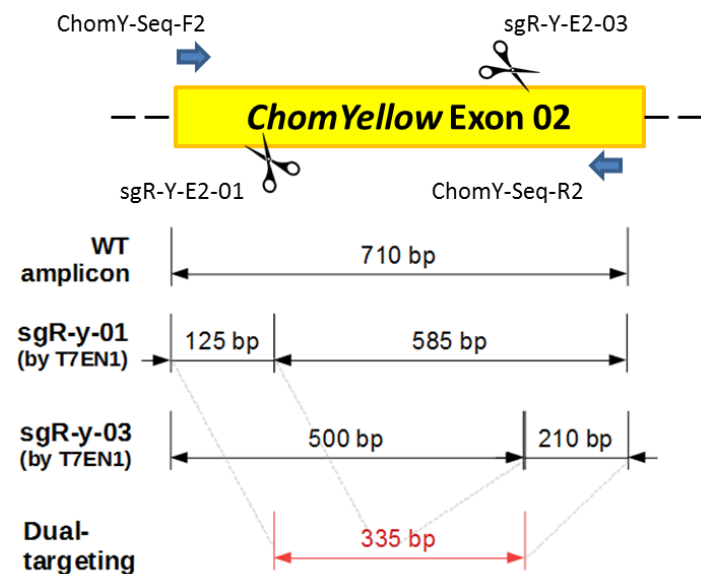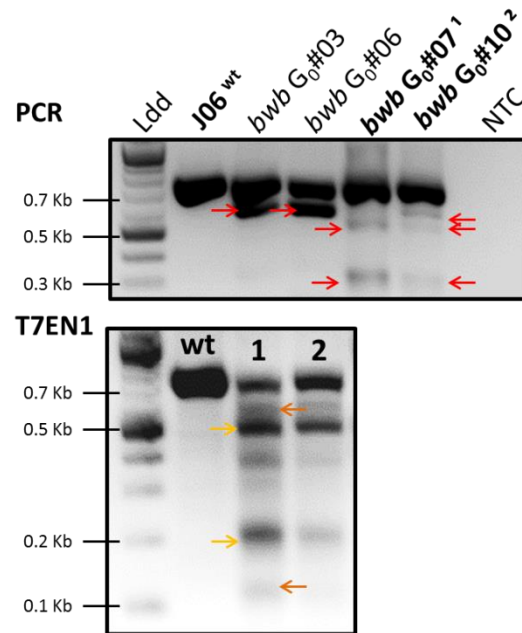**b**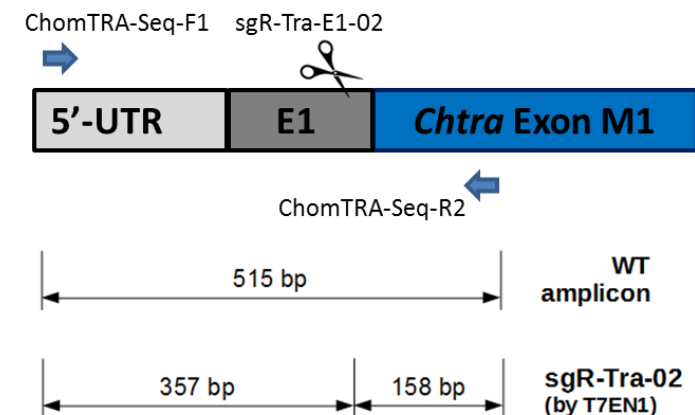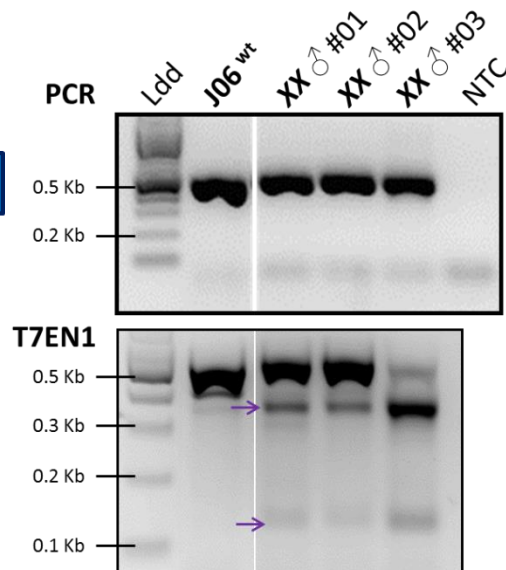

**Figure S5. T7 endonuclease 1 assay (T7EN1) of Cas9 targeted sites in the screwworm genome. (a)** Schematic of CRISPR strategy used to knockout the *ChY* loci (leftmost), showing the positions of each sgRNAs (scissors), PCR genotyping primers (blue arrows), the PCR amplicon size for wildtype (wt) and the expected band migration after the T7EN1 assay. (rightmost) PCR amplifications of *ChY* targeted site on J06 wt and selected *bwb* mosaic flies obtained at G<sub>0</sub> (above). Putative medium to large deletions (red arrows) were detected in these amplifications, presumably due to the *dual-targeting* approach (see alleles in Figure 1C and S5). Only crosses made with the male flies #07 and #10 resulted in viable G<sub>1</sub> eggs (see Results), thus these two flies were submitted to the T7EN1 assay (bellow), which revealed the presence of indels at the specific Cas9 targeted sites of the used sgRNAs: sgR-Y-E2-01 (orange arrows) and sgR-Y-E2-03 (yellow arrows). **(b)** (leftmost) Schematic of CRISPR strategy used to knockout the *Chtra* locus and expected band migration for wt and after T7EN1. (rightmost) PCR amplifications of *Chtra* targeted site (above) and results obtained by T7EN1 assay (bellow) for the intersexed flies showed in Figure 3B. Band migration patterns consistent with the expected Cas9 cleavage using the sgRNA sgR-Tra-E1-02. Other abbreviations used: Ldd = Ladder; NTC = non-template control; Kb = Kilo bases.



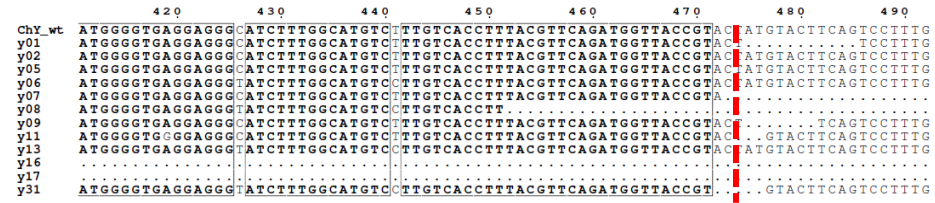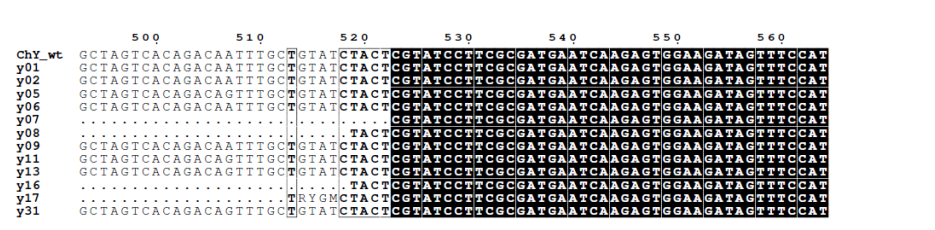

**Figure S6. Multiple Sequence Alignment of *bwb*-mutated alleles in *C. hominivorax* introduced by Cas9.** Sequence variants recovered from G<sub>0</sub> flies were mapped against the wildtype reference sequence (ChY\_wt, in the alignment) using MUSCLE algorithm (Edgar, 2004) implemented on MEGA7 (Kumar *et al.* 2016), with default options. Alleles were collapsed in “haplotypes” (y#, in the alignment) using the online tool ALTER (Glez-Peña *et al.* 2010) and visualized using ESPrnt v.3.0 (Robert and Gouet, 2014; nucleotides in black boxes represent %Equivalent ≥ 0.7). Positions of the sgRNAs used in the microinjections experiments are highlighted in orange and their respective PAM motifs in yellow. The Cas9 predicted cut sites (3-nt upstream of the PAM) are shown in red-dashed lines. We were able to recover 2 “haplotypes” (y16 and y17), represented by 9 clones (Fig. 1C), showing a large deletion (~360bp) between both sgRNAs target sites, indicating that *CRISPR dual-targeting approach* can be used for molecular genotyping of screwworm Cas9-derived mutants, although optimization is still required.

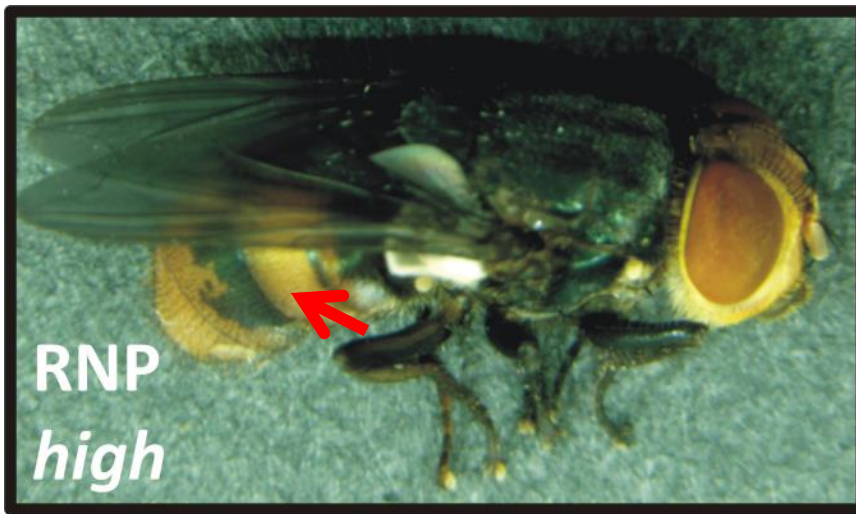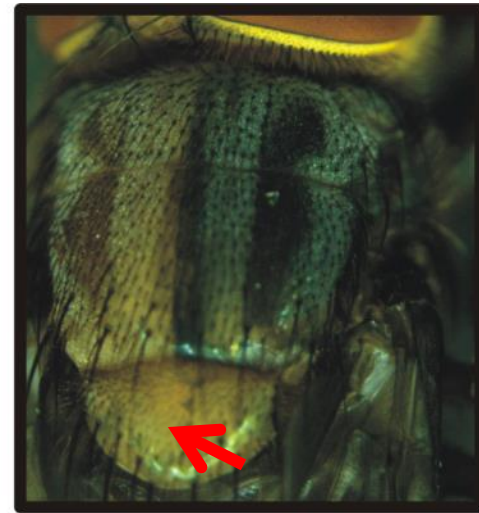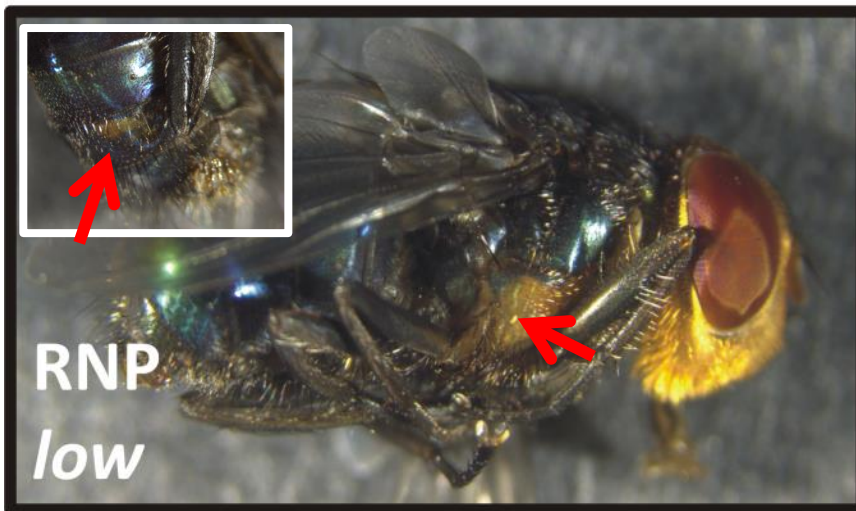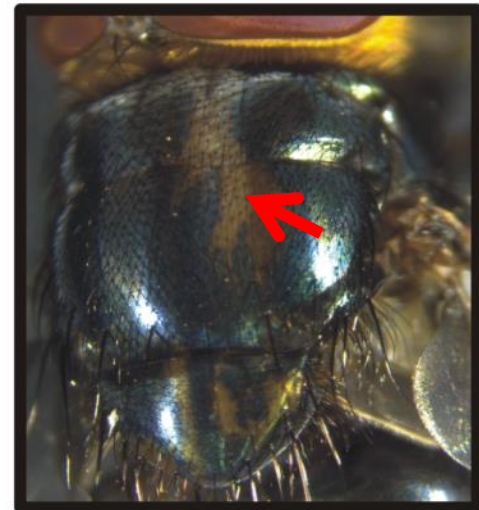

**Figure S7. Phenotypic variation between mosaic *bwb* screwworm flies.** Adult mutant phenotypes of individuals injected with the high (500 ng/ul) concentration of the RNPs frequently showed a larger unpigmented body area than those injected with the low (360 ng/ul) concentration (indicated by red arrows).



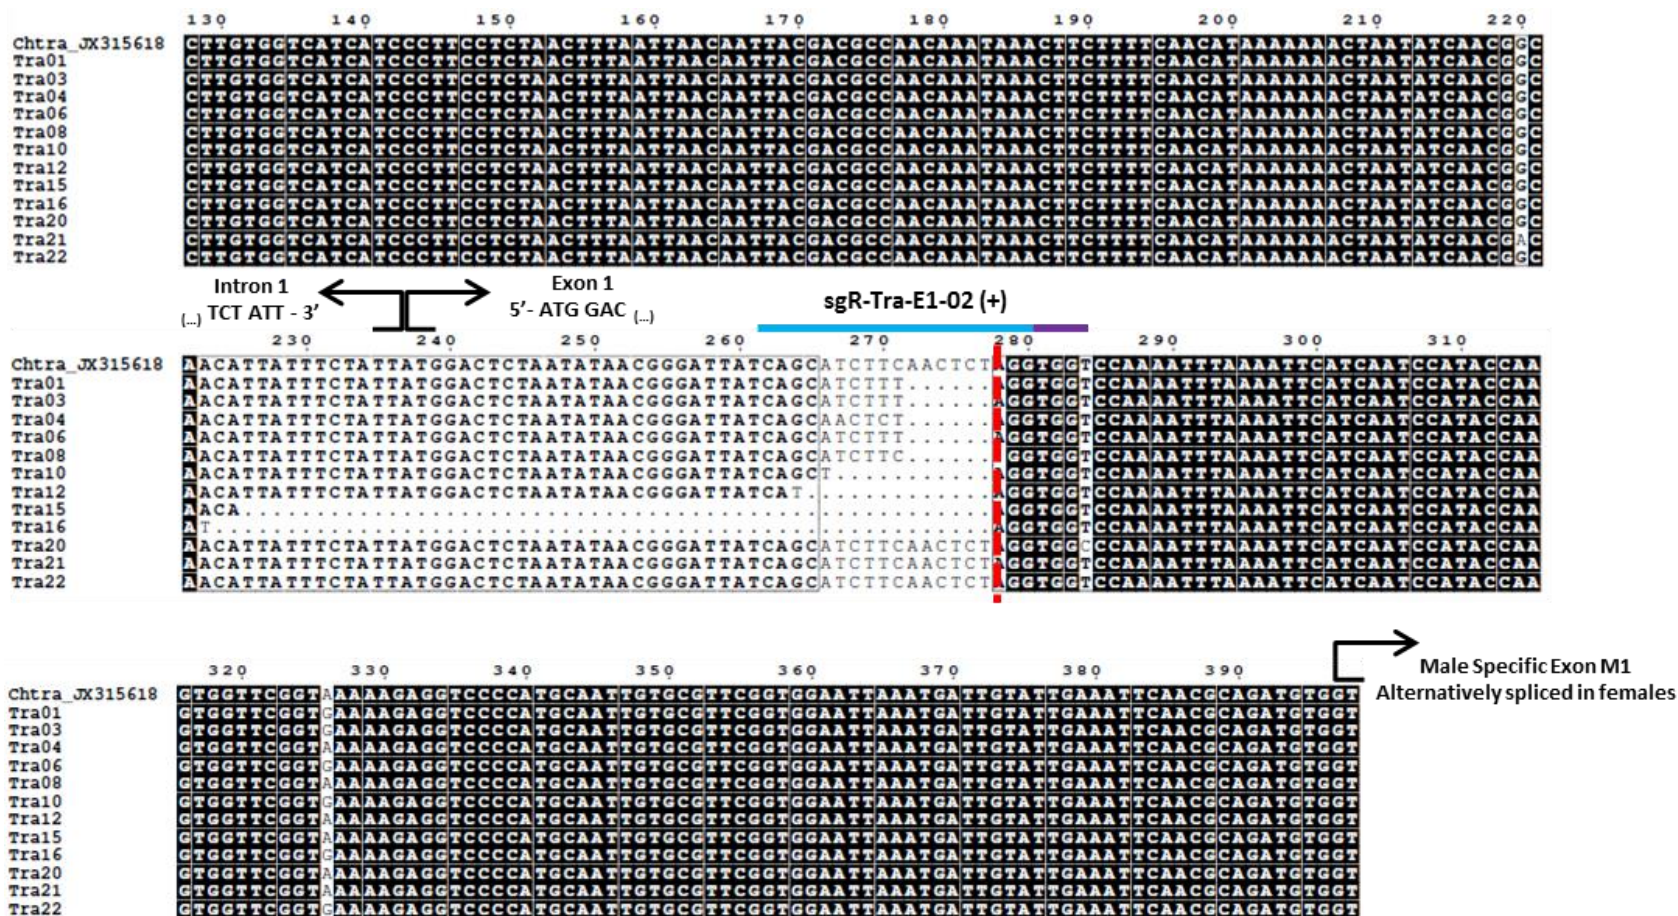

**Figure S8. Multiple Sequence Alignment of *tra*-mutated alleles in *C. hominivorax* genome introduced by Cas9.** Sequence variants recovered from intersexed  $G_0$  flies (Fig. 3B) were mapped against the wildtype reference sequence (Chtra\_JX315618, in the alignment) using MUSCLE algorithm (Edgar, 2004) implemented on MEGA7 (Kumar *et al.* 2016), with default options. Alleles were collapsed in “haplotypes” (TRA#, in the alignment) using the online tool ALTER (Glez-Peña *et al.* 2010) and visualized using ESPrnt v.3.0 (Robert and Gouet, 2014; nucleotides in black boxes represent %Equivalent  $\geq 0.7$ ). Position of the sgRNA used in the microinjections experiments is highlighted in blue and the PAM motif in purple. The Cas9 predicted cut sites (3-nt upstream of the PAM) are shown in red-dashed lines. Black arrows indicate the genomic position of *Chtra* Intron 1, Exon 1 and the start of the male specific exon M1.

**Table S1. Sequences of the single guide RNAs (sgRNAs) used in this study.** The sgRNAs were designed by using the standalone version of CRISPOR tool (Concordet and Haeussler 2018). Potential off-targets (see alignments below) were evaluated in the context of *C. hominivorax* draft assembly (A.C.M. Junqueira, unpublished) and the complete genome sequence of *L. cuprina* (Anstead *et al.* 2015). We only considered sgRNAs that have potential off-targets with more than 3 mismatches in total, with the maximum amount of mismatches present on the 5 – 10 first bases of the sgRNA directly upstream to PAM motif, which constitute the so called “seed” region (Andersson *et al.*, 2015; Zheng *et al.*, 2016). Syntheses of sgRNAs were performed via PCR as described by Bassett and Liu (2014), using the primers sgR-Specific-T7-FWD (5'- GAA ATT AAT ACG ACT CAC TAT A(**GG**) [*specific sgRNA sequence without PAM*] TTG GGT TTT AGA GCT AGA AAT AGC -3') and sgR-Universal-REV (5'- AAA AGC ACC GAC TCG GTG CCA CTT TTT CAA GTT GAT AAC GGA CTA GCC TTA TTT TAA CTT GCT ATT TCT AGC TCT AAA AC -3').

| Species                        | Target site         | Guide Name    | Direction | Protospacer + PAM motif                   | Length | Potential off-targets<br>for 0-1-2-3-4 mismatches | mitSpecScore |
|--------------------------------|---------------------|---------------|-----------|-------------------------------------------|--------|---------------------------------------------------|--------------|
| <i>Cochliomyia hominivorax</i> | Yellow (ChY)        | sgR-Y-E2-01   | +         | ( <b>GG</b> )TTTGGATACTGGTACTG <b>TGG</b> | 20 nt  | 0-0-0-0-4 <sup>a</sup>                            | 89           |
|                                |                     | sgR-Y-E2-03   | -         | AAGGACTGAAGTACATAGTA <b>CGG</b>           | 20 nt  | 0-0-0-0-5 <sup>b</sup>                            | 69           |
|                                | transformer (Chtra) | sgR-Tra-E1-02 | +         | CCATGCAATTGTGCGTTCGG <b>TGG</b>           | 20 nt  | 0-0-0-0-3 <sup>c</sup>                            | 92           |
| <i>Lucilia cuprina</i>         | Yellow (LcY)        | Lc-y-sgRNA2   | +         | AGCATAGGGGCAAGGAT <b>TGG</b>              | 17 nt  | 0-0-0-1-1 <sup>d</sup>                            | 100          |
|                                |                     | Lc-y-sgRNA1   | +         | TGTTTGTAACGGTTCCAGG <b>TGG</b>            | 20 nt  | 0-0-0-0-1 <sup>e</sup>                            | 100          |

**a** sgR-Y-E2-01 GGTTTTGGATACTGGTACTG  
off-target-01 GGT**T**TTGG**t**TACTGGT**gga**G  
off-target-02 GGT**a**TT**a**GATACTGGTAC**gt**  
off-target-03 G**t**TTTTGGATA**ag**GaTACTG  
off-target-04 GGT**T**TTGG**aa**CTG**t**T**c**CTG

**b** sgR-Y-E2-03 AAGGACTGAAGTACATAGTA  
off-target-01 AA**c**GACTGA**a**CTACATA**aa**A  
off-target-02 **g**AGGACTGAAGTA**t**ATAT**tt**  
off-target-03 AAGGACTGA**tt**TACA**gt**GT**t**  
off-target-04 AAGGACTGA**c**GTACA**at**GT**t**  
off-target-05 AAGGAC**a**GAAG**aAaAa**AGTA

**c** sgR-Tra-E1-02 CCATGCAATTGTGCGTTCGG  
off-target-01 CCA**a**GCAATTGTGCG**a**T**g**G**t**  
off-target-02 **ta**ATGCAATTGTG**ca**T**c**CGG  
off-target-03 **tc**AT**c**CAATTGTG**t**GT**TCa**G

**d** Lc-y-gRNA2 AGCATAGGGGCAAGGATTGG  
off-target-01 **Aa**CATAGGGGCAAGG**c**TT**t**G  
off-target-02 AG**C**CTA**a**GGG**C**AGG**t**TTGG

**e** Lc-y-sgRNA1 TGTTTGTAACGGTTCCAGG  
off-target-01 TGTTT**t**TAA**g**GGTT**a**CCAG**c**

**Table S2. Specifications of the genotyping primers used in this study.** Primers used to sample the allele variants introduced by the Cas9 RNPs on the screwworm and blowfly targeted loci. PCRs were followed by molecular cloning and Sanger sequencing. Sequenced reads were analyzed by CrispRVariants package v.1.8.0 (Lindsay et al. 2016).

| Species                        | Targeted site              | Primer Name    | Sequence (5' → 3')                        | Length | Ta     | Amplicon Size |
|--------------------------------|----------------------------|----------------|-------------------------------------------|--------|--------|---------------|
| <i>Cochliomyia hominivorax</i> | <b>Yellow (ChY)</b>        |                |                                           |        |        |               |
|                                | 5'-end Exon 2              | ChomY-Seq-F2   | GCC CTA ATA CCG TAC CCC GA                | 20 nt  | 59.4°C | 710 bp        |
|                                | (Figure 1A)                | ChomY-Seq-R2   | AGA AGA ATG CCA GCA ACC GA                | 20 nt  |        |               |
|                                | <b>transformer (Chtra)</b> |                |                                           |        |        |               |
|                                | 5'-UTR to Intron M1        | ChomTRA-Seq-F1 | GTC AGC AGC AAA GAT CTG TCA               | 21 nt  | 51.2°C | 515 bp        |
|                                | (Figure 3A)                | ChomTRA-Seq-R2 | AAT CCC AAC AGT ATG CTT                   | 18 nt  |        |               |
| <i>Lucilia cuprina</i>         | <b>Yellow (LcY)</b>        |                |                                           |        |        |               |
|                                | 5'-end Exon 2              | Lc-y-g1F       | CTT ACA TCA ATA TGG ATC ACA GTG TAA CC    | 29 nt  | 55.6°C | 283 bp        |
|                                |                            | Lc-y-g1R       | AAT GTA TTG GCA TTT GTA TCA TCA GCT C     | 28 nt  |        |               |
|                                | 3'-end Exon 1              | Lc-y-g2F       | GAA CGT TAT AGT TGG AAT CAG TTG GAT T     | 28 nt  | 52.2°C | 431 bp        |
|                                | (Figure 2A)                | Lc-y-g2R       | GAA TCC TCA TCA TCA ATA ATT GTA TCA GAC A | 31 nt  |        |               |



| Backcrossing to <i>bwb</i> strain | G0 ♂ founder generated with: |                   |
|-----------------------------------|------------------------------|-------------------|
|                                   | Cas9 360ng/ul                | Cas9 500ng/ul     |
| Cage 01                           | 56 / 139 (40.3%)             | Infertile eggs    |
| Cage 02                           | 0 / 120 (00.0%)              | 11 / 83 (13.3%)   |
| Cage 03                           | 0 / 131 (00.0%)              | 78 / 96 (81.3%)   |
| Cage 04                           | 47 / 125 (37.6%)             | Infertile eggs    |
| Cage 05                           | 78 / 173 (45.1%)             | 126 / 126 (100%)  |
| Cage 06                           | 71 / 144 (49.3%)             | 117 / 121 (96.7%) |
| Cage 07                           | 32 / 173 (18.5%)             | 120 / 120 (100%)  |
| Cage 08                           | 77 / 163 (47.2%)             | 0 / 112 (00.0%)   |
| Cage 09                           | 85 / 178 (47.8%)             | 0 / 145 (00.0%)   |
| Cage 10                           | 31 / 147 (21.1%)             | 118 / 118 (100%)  |
| Avg ± SEM                         | 38.4 ± 4.3%                  | 81.9 ± 14%        |

**Table S3. Effect of Cas9 RNPs concentration on germline transmission of *bwb* mutation.** For each microinjection experiment using a low (360ng/ul) or high (500ng/ul) concentration of Cas9 protein, 10 mosaic males were randomly selected and tested for their founder habilities by individually backcrossing them with virgin *bwb* females. The G1 offspring were screened for the presence of biallelic *bwb* mutants, revealing germline transmission of the mutated allele.
